# Supplementary material
Source: ML conference proceedings conference paper supplement (https://aclanthology.org/W15-2605)
Supplement: Attachment [file Tablas completas-1-5.pdf › Tablas completas-1-5.pdf]

## SUPPLEMENTARY MATERIAL

### Common English complexities

- Hyphenated compound words

**Table 2:** Tokenizers output for sentence (1)

| Tokenizer                      | Output                |
|--------------------------------|-----------------------|
| 1, 2, 3, 4, 6, 7, 8, 9, 10, 11 | Normal chest x-ray.   |
| 5                              | Normal chest x - ray. |
| 12                             | Normal chest x- ray.  |

**Table 3:** Tokenizers output for sentence (2)

| Tokenizer             | Output                                    |
|-----------------------|-------------------------------------------|
| 1, 2, 6, 8, 9, 11, 12 | 2-year 2-month old female with pneumonia. |
| 3, 4, 5, 7            | 2-year 2-month old female with pneumonia. |
| 10                    | 2-year 2-month old female with pneumonia. |

**Table 4:** Tokenizers output for sentence (3)

| Tokenizer                    | Output                                                                          |
|------------------------------|---------------------------------------------------------------------------------|
| 1, 2, 4, 6, 8, 9, 10, 11, 12 | This may occur through the ability of IL-10 to induce expression of the gene.   |
| 5, 7                         | This may occur through the ability of IL - 10 to induce expression of the gene. |
| 3                            | This may occur through the ability of IL- 10 to induce expression of the gene.  |

- Words with letters and slashes

**Table 5:** Tokenizers output for sentence (4)

| Tokenizer          | Output                                                                    |
|--------------------|---------------------------------------------------------------------------|
| 2, 6, 8, 9, 11, 12 | The maximal effect is observed at the IL-10 concentration of 20 U/ml.     |
| 3, 5, 7            | The maximal effect is observed at the IL - 10 concentration of 20 U / ml. |
| 1, 4, 10           | The maximal effect is observed at the IL-10 concentration of 20 U / ml.   |

**Table 6:** Tokenizers output for sentence (5)

| Tokenizer | Output |
|-----------|--------|
|-----------|--------|

These results indicate that within the TCR/CD3 signal transduction pathway both PKC and calcineurin are required for the effective activation of the IKK complex and NF-kappaB in T lymphocytes.

These results indicate that within the TCR / CD3 signal transduction pathway both PKC and calcineurin are required for the effective activation of the IKK complex and NF - kappaB in T lymphocytes.

- Words with letters and apostrophes

**Table 7:** Tokenizers output for sentence (6)

| Tokenizer                 | Output                                                                                                                                                   |
|---------------------------|----------------------------------------------------------------------------------------------------------------------------------------------------------|
| 1, 2, 4, 8, 9, 10, 11, 12 | The false positive rate of our predictor was estimated by the method of D'Haeseleer and Church 1855 and used to compare it to other prediction datasets. |

The false positive rate of our predictor was estimated by the method of D ' Haeseleer and Church 1855 and used to compare it to other prediction datasets.

**Table 8:** Tokenizers output for sentence (7)

| Tokenizer                    | Output                                                                                          |
|------------------------------|-------------------------------------------------------------------------------------------------|
| 1, 2, 4, 6, 8, 9, 10, 11, 12 | Small, scarred right kidney, below more than 2 standard deviations in size for patient's age.   |
| 3, 5, 7                      | Small, scarred right kidney, below more than 2 standard deviations in size for patient ' s age. |

- Words with letters and brackets

**Table 9:** Tokenizers output for sentence (8)

| Tokenizer             | Output                                                                                                                                                         |
|-----------------------|----------------------------------------------------------------------------------------------------------------------------------------------------------------|
| 1, 2, 5, 7, 8, 11, 12 | Of these, Diap1 has been most extensively characterized: it can block cell death caused by the ectopic expression of reaper, hid, and grim (reviewed in [26]). |
| 6                     | Of these, Diap1 has been most extensively characterized: it can block cell death caused by the ectopic expression of reaper, hid, and grim (reviewed in [26]). |

|    |                                                                                                                                                                        |
|----|------------------------------------------------------------------------------------------------------------------------------------------------------------------------|
| 9  | Of these, Diap1 has been most extensively characterized; it can block cell death caused by the ectopic expression of reaper, hid, and grim (reviewed in [26]).         |
| 4  | Of these, Diap1 has been most extensively characterized; it can block cell death caused by the ectopic expression of reaper, hid, and grim (reviewed in [26]).         |
| 10 | Of these, Diap1 has been most extensively <b>characterized</b> ; it can block cell death caused by the ectopic expression of reaper, hid, and grim (reviewed in [26]). |
| 3  | Of these, <b>Diap1</b> has been most extensively characterized; it can block cell death caused by the ectopic expression of reaper, hid, and grim (reviewed in [26]).  |

- **Abbreviations in capital letters and acronyms**

**Table 10:** Tokenizers output for sentence (9)

| Tokenizer   | Output                                                                                                                                                                           |
|-------------|----------------------------------------------------------------------------------------------------------------------------------------------------------------------------------|
| 4, 6, 8, 11 | Mutants in Toll signaling pathway were obtained from <b>Dr. S. Govind</b> : cactE8, cactIII <sup>G</sup> and cactD13 mutations in the cact gene on Chromosome II.                |
| 9           | Mutants in Toll signaling pathway were obtained from Dr. S. Govind: <b>cactE8, cactIII<sup>G</sup></b> and cactD13 mutations in the cact gene on Chromosome II.                  |
| 2, 5, 7     | Mutants in Toll signaling pathway were obtained from <b>Dr. S. Govind</b> : cactE8, cactIII <sup>G</sup> and cactD13 mutations in the cact gene on Chromosome II.                |
| 1           | Mutants in Toll signaling pathway were obtained from <b>Dr. S. Govind</b> : <b>cactE8, cactIII<sup>G</sup></b> and cactD13 mutations in the cact gene on <b>Chromosome II</b> .  |
| 10          | Mutants in Toll signaling pathway were <b>obtained</b> from <b>Dr. S. Govind</b> : cactE8, <b>cactIII<sup>G</sup></b> and cactD13 mutations in the cact gene on Chromosome II.   |
| 3           | Mutants in Toll signaling pathway were obtained from <b>Dr. S. Govind</b> : <b>cactE8</b> , cactIII <sup>G</sup> and <b>cactD13</b> mutations in the cact gene on Chromosome II. |

|    |                                                                                                                                                                         |
|----|-------------------------------------------------------------------------------------------------------------------------------------------------------------------------|
| 12 | Mutants in Toll signaling pathway were obtained from Dr. S. Govind: <b>cactE8, cactIII<sup>G</sup></b> and cactD13 mutations in the cact gene on Chromosome <b>II</b> . |
|----|-------------------------------------------------------------------------------------------------------------------------------------------------------------------------|

**Table 11:** Tokenizers output for sentence (10)

| Tokenizer          | Output                                                                                                                                                                                                               |
|--------------------|----------------------------------------------------------------------------------------------------------------------------------------------------------------------------------------------------------------------|
| 2, 6, 8, 9, 12     | The transcripts were detected in all the <b>CD4<sup>-</sup>CD8<sup>-</sup>, CD4<sup>+</sup>CD8<sup>+</sup>, CD4<sup>+</sup>CD8<sup>-</sup></b> and <b>CD4<sup>-</sup>CD8<sup>+</sup></b> cell populations.           |
| 1, 3, 4, 7, 10, 11 | The transcripts were detected in all the <b>CD4<sup>-</sup>CD8<sup>-</sup>, CD4<sup>+</sup>CD8<sup>+</sup>, CD4<sup>+</sup>CD8<sup>-</sup></b> and <b>CD4<sup>-</sup>CD8<sup>+</sup></b> cell populations.           |
| 5                  | The transcripts were detected in all the <b>CD4<sup>-</sup>CD8<sup>-</sup>, CD4<sup>+</sup>CD8<sup>+</sup></b> and <b>CD4<sup>+</sup>CD8<sup>-</sup></b> and <b>CD4<sup>-</sup>CD8<sup>+</sup></b> cell populations. |

- **Words with letters and periods**

**Table 12:** Tokenizers output for sentence (11)

| Tokenizer    | Output                                                                                                                                                    |
|--------------|-----------------------------------------------------------------------------------------------------------------------------------------------------------|
| 2, 8         | Two stop codons of an iORF ( <b>i.e.</b> the inframe and C-terminal stops) can be any combination of canonical stop codons (TAA, TAG, TGA).               |
| 1, 6, 11, 12 | Two stop codons of an iORF ( <b>i.e.</b> the inframe and C-terminal stops) can be any combination of canonical stop codons (TAA, TAG, TGA).               |
| 9            | Two stop codons of an iORF ( <b>i.e.</b> the inframe and C-terminal stops) can be any combination of canonical stop codons (TAA, TAG, TGA).               |
| 4, 7         | Two stop codons of an iORF ( <b>i.e.</b> the inframe and <b>C-terminal</b> stops) can be any combination of canonical stop codons (TAA, TAG, TGA).        |
| 5            | Two stop codons of an iORF ( <b>i.e.</b> the inframe and <b>C-terminal</b> stops) can be any combination of canonical stop codons (TAA, TAG, TGA).        |
| 10           | Two stop codons of an iORF ( <b>i.e.</b> the inframe and <b>C-terminal</b> stops) can be any <b>combination</b> of canonical stop codons (TAA, TAG, TGA). |

|   |                                                                                                                                     |
|---|-------------------------------------------------------------------------------------------------------------------------------------|
| 3 | Two stop codons of an iORF (i.e. the inframe and C-terminal stops) can be any combination of canonical stop codons (TAA, TAG, TGA). |
|---|-------------------------------------------------------------------------------------------------------------------------------------|

- Words with letters and numbers

**Table 13:** Tokenizers output for sentence (12)

| Tokenizer                      | Output                                                                                                                                                    |
|--------------------------------|-----------------------------------------------------------------------------------------------------------------------------------------------------------|
| 1, 2, 4, 5, 6, 7, 8, 9, 11, 12 | Selenocysteine and pyrrolysine are the <b>21st</b> and <b>22nd</b> amino acids which are genetically encoded by stop codons.                              |
| 10                             | Selenocysteine and pyrrolysine are the <b>21<sup>st</sup></b> and <b>22nd</b> amino acids which are genetically <b>enc<sub>o</sub>ded</b> by stop codons. |
| 3                              | Selenocysteine and pyrrolysine are the <b>21<sup>st</sup></b> and <b>22<sup>nd</sup></b> amino acids, which are genetically encoded by stop codons.       |

- Words with numbers and one type of punctuation

**Table 14:** Tokenizers output for sentence (13)

| Tokenizer                 | Output                                                                |
|---------------------------|-----------------------------------------------------------------------|
| 1, 5, 6, 8, 9, 10, 11, 12 | A total of <b>26,003</b> iORF satisfied the above criteria.           |
| 2, 3, 4, 7                | A total of <b>26<sup>003</sup></b> iORF satisfied the above criteria. |

**Table 15:** Tokenizers output for sentence (14)

| Tokenizer             | Output                                                                            |
|-----------------------|-----------------------------------------------------------------------------------|
| 1, 2, 6, 8, 9, 11, 12 | The patient had prior <b>x-ray</b> on <b>1/2</b> which demonstrated no pneumonia. |
| 4, 5, 7               | The patient had prior <b>x-ray</b> on <b>1/2</b> which demonstrated no pneumonia. |
| 3, 10                 | The patient had prior <b>x-ray</b> on <b>1/2</b> which demonstrated no pneumonia. |

**Table 16:** Tokenizers output for sentence (15)

| Tokenizer                    | Output                                                                                                                                                                 |
|------------------------------|------------------------------------------------------------------------------------------------------------------------------------------------------------------------|
| 3, 4, 5, 6, 7, 8, 9, 10, 11, | Indeed, it has been estimated recently that the current yeast and human protein interaction maps are only <b>50%</b> and <b>10%</b> complete, respectively <b>18</b> . |
| 1                            | Indeed, it has been estimated recently that the current yeast and human protein interaction maps                                                                       |

|    |                                                                                                                                                                        |
|----|------------------------------------------------------------------------------------------------------------------------------------------------------------------------|
|    | are only <b>50%</b> and <b>10%</b> complete, respectively <b>18</b> .                                                                                                  |
| 12 | Indeed, it has been estimated recently that the current yeast and human protein interaction maps are only <b>50%</b> and <b>10%</b> complete, respectively <b>18</b> . |

**Table 17:** Tokenizers output for sentence (16)

| Tokenizer                       | Output                                                                                            |
|---------------------------------|---------------------------------------------------------------------------------------------------|
| 1, 2, 4, 5, 6, 8, 9, 10, 11, 12 | The dotted line indicates significance level <b>0.05</b> after a correction for multiple testing. |
| 3, 7                            | The dotted line indicates significance level <b>0.05</b> after a correction for multiple testing. |

**Table 18:** Tokenizers output for sentence (17)

| Tokenizer              | Output                                                                                                                        |
|------------------------|-------------------------------------------------------------------------------------------------------------------------------|
| 1, 2, 8, 9, 10, 11, 12 | E-selectin is induced within <b>1-2h</b> , peaks at <b>4-6h</b> , and gradually returns to basal level by <b>24h</b> .        |
| 6                      | E-selectin is induced within <b>1-2h</b> , peaks at <b>4-6h</b> , and gradually returns to basal level by <b>24h</b> .        |
| 4, 7                   | E-selectin is induced within <b>1-2h</b> , peaks at <b>4-6h</b> , and gradually returns to basal level by <b>24h</b> .        |
| 5                      | <b>E-selectin</b> is induced within <b>1-2h</b> , peaks at <b>4-6h</b> , and gradually returns to basal level by <b>24h</b> . |
| 3                      | <b>E-selectin</b> is induced within <b>1-2h</b> , peaks at <b>4-6h</b> , and gradually returns to basal level by <b>24h</b> . |

- Numeration

**Table 19:** Tokenizers output for sentence (18)

| Tokenizer                       | Output                                                                                                                                                                       |
|---------------------------------|------------------------------------------------------------------------------------------------------------------------------------------------------------------------------|
| 1, 2, 3, 5, 7, 8, 9, 10, 11, 12 | <b>1</b> . Bioactivation of sulphamethoxazole (SMX) to chemically-reactive metabolites and subsequent protein conjugation is thought to be involved in SMX hypersensitivity. |
| 4, 6                            | <b>1</b> . Bioactivation of sulphamethoxazole (SMX) to chemically-reactive metabolites and subsequent protein conjugation is thought to be involved in SMX hypersensitivity. |

- A hypertext markup symbol

**Table 20:** Tokenizers output for sentence (19)

| Tokenizer  | Output                                                                                                          |
|------------|-----------------------------------------------------------------------------------------------------------------|
| 2, 4, 5, 8 | Bcd_mRNA_transcripts_of_&lt;_or_=_2.6_kb_were_selectively_expressed_in_PBL_and_testis_of_healthy_individuals_.  |
| 6          | Bcd_mRNA_transcripts_of_&lt;_or_=_2.6kb_were_selectively_expressed_in_PBL_and_testis_of_healthy_individuals_.   |
| 9, 12      | Bcd_mRNA_transcripts_of_&lt;_or_=_2.6_kb_were_selectively_expressed_in_PBL_and_testis_of_healthy_individuals_.  |
| 3, 7       | Bcd_mRNA_transcripts_of_&lt;_or_=_2_6_kb_were_selectively_expressed_in_PBL_and_testis_of_healthy_individuals_.  |
| 11         | Bcd_mRNA_transcripts_of_&lt;_or_=_2.6_kb_were_selectively_expressed_in_PBL_and_testis_of_healthy_individuals_.  |
| 1          | Bcd_mRNA_transcripts_of_or_=_2.6_kb_were_selectively_expressed_in_PBL_and_testis_of_healthy_individuals_.       |
| 10         | Bc_d_mRNA_transcripts_of_&lt;_or_=_2.6_kb_were_selectively_expressed_in_PBL_and_testis_of_healthy_individuals_. |

- A URL

**Table 21:** Tokenizers output for sentence (20)

| Tokenizer | Output                                                                                                                        |
|-----------|-------------------------------------------------------------------------------------------------------------------------------|
| 2, 6, 8,  | Names_of_all_available_Trace_Databases_were_taken_from_a_list_of_databases_at_http://www.ncbi.nlm.nih.gov/blast/mmtrace.shtml |
| 9         | Names_of_all_available_Trace_Databases_were_taken_from_a_list_of_databases_at_http://www.ncbi.nlm.nih.gov/blast/mmtrace.shtml |
| 3, 5, 7   | Names_of_all_available_Trace_Databases_were_taken_from_a_list_of_databases_at_http://www.ncbi.nlm.nih.gov/blast/mmtrace.shtml |
| 11, 12    | Names_of_all_available_Trace_Databases_were_taken_from_a_list_of_databases_at_http://www.ncbi.nlm.nih.gov/blast/mmtrace.shtml |

|    |                                                                                                                                 |
|----|---------------------------------------------------------------------------------------------------------------------------------|
| 1  | Names_of_all_available_Trace_Databases_were_taken_from_a_list_of_databases_at_http://www.ncbi.nlm.nih.gov/blast/mmtrace.shtml   |
| 4  | Names_of_all_available_Trace_Databases_were_taken_from_a_list_of_databases_at_http://www.ncbi.nlm.nih.gov/blast/mmtrace.shtml_1 |
| 10 | Names_of_all_available_Trace_Databases_were_taken_from_a_list_of_databases_at_http://www.ncbi.nlm.nih.gov/blast/mmtrace.shtml   |

## Biomedical English complexities

- A DNA sequence

**Table 22:** Tokenizers output for sentence (21)

| Tokenizer                      | Output                                                                                                                                                         |
|--------------------------------|----------------------------------------------------------------------------------------------------------------------------------------------------------------|
| 1, 2, 4, 5, 6, 7, 8, 9, 11, 12 | Footprinting_analysis_revealed_that_the_identical_sequence_CCGAAACTGAAAAGG_designated_E6_was_protected_by_nuclear_extracts_from_B_cells_T_cells_or_HeLa_cells. |
| 10                             | Footprinting_analysis_revealed_that_the_identical_sequence_CCGAAACTGAAAAGG_designated_E6_was_protected_by_nuclear_extracts_from_B_cells_T_cells_or_HeLa_cells. |
| 3                              | Footprinting_analysis_revealed_that_the_identical_sequence_CCGAAACTGAAAAGG_designated_E6_was_protected_by_nuclear_extracts_from_B_cells_T_cells_or_HeLa_cells. |

- Temporal expressions

**Table 23:** Tokenizers output for sentence (22)

| Tokenizer          | Output                                                           |
|--------------------|------------------------------------------------------------------|
| 2, 6, 8, 9, 11, 12 | This_was_last_documented_on_the_Nuclearv_Cystogram_dated_1/2/01. |
| 1, 3, 4, 7, 10     | This_was_last_documented_on_the_Nuclearv_Cystogram_dated_1_2_01. |
| 1                  | This_was_last_documented_on_the_Nuclearv_Cystogram_dated_1/2/01. |

- Chemical substances

**Table 24:** Tokenizers output for sentence (23)

| Tokenizer  | Output                                                                                                                                  |
|------------|-----------------------------------------------------------------------------------------------------------------------------------------|
| 6, 8,      | These results reveal a central role for <b>CaMKIV/Gr</b> as a <b>Ca(2+)-regulated</b> activator of gene transcription in T lymphocytes. |
| 9          | These results reveal a central role for <b>CaMKIV/Gr</b> as a <b>Ca(2+)-regulated</b> activator of gene transcription in T lymphocytes. |
| 1, 3, 4, 7 | These results reveal a central role for <b>CaMKIV/Gr</b> as a <b>Ca(2+)-regulated</b> activator of gene transcription in T lymphocytes. |
| 11         | These results reveal a central role for <b>CaMKIV/Gr</b> as a <b>Ca(2+)-regulated</b> activator of gene transcription in T lymphocytes. |
| 10         | These results reveal a central role for <b>CaMKIV/Gr</b> as a <b>Ca(2+)-regulated</b> activator of gene transcription in T lymphocytes. |
| 2          | These results reveal a central role for <b>CaMKIV/Gr</b> as a <b>Ca(2+)-regulated</b> activator of gene transcription in T lymphocytes. |
| 12         | These results reveal a central role for <b>CaMKIV/Gr</b> as a <b>Ca(2+)-regulated</b> activator of gene transcription in T lymphocytes. |

**Table 25:** Tokenizers output for sentence (24)

| Tokenizer      | Output                                                                                                                                                                                                                                                                                                         |
|----------------|----------------------------------------------------------------------------------------------------------------------------------------------------------------------------------------------------------------------------------------------------------------------------------------------------------------|
| 1, 2, 6, 8, 11 | Expression of a highly specific protein inhibitor for cyclic <b>AMP-dependent</b> protein kinases in <b>interleukin-1(IL-1)-responsive</b> cells blocked <b>IL-1-induced</b> gene transcription that was driven by the kappa immunoglobulin enhancer or the human immunodeficiency virus long terminal repeat. |
| 9              | Expression of a highly specific protein inhibitor for cyclic <b>AMP-dependent</b> protein kinases in <b>interleukin-1(IL-1)-responsive</b> cells blocked <b>IL-1-induced</b> gene transcription that was driven by the kappa immunoglobulin enhancer or the human immunodeficiency virus long terminal repeat. |

|    |                                                                                                                                                                                                                                                                                                                       |
|----|-----------------------------------------------------------------------------------------------------------------------------------------------------------------------------------------------------------------------------------------------------------------------------------------------------------------------|
| 7  | Expression of a highly specific protein inhibitor for cyclic <b>AMP-dependent</b> protein kinases in <b>interleukin-1(IL-1)-responsive</b> cells blocked <b>IL-1-induced</b> gene transcription that was driven by the kappa immunoglobulin enhancer or the human immunodeficiency virus long terminal repeat.        |
| 5  | Expression of a highly specific protein inhibitor for cyclic <b>AMP-dependent</b> protein kinases in <b>interleukin-1(IL-1)-responsive</b> cells blocked <b>IL-1-induced</b> gene transcription that was driven by the kappa immunoglobulin enhancer or the human immunodeficiency virus long terminal repeat.        |
| 4  | Expression of a highly specific protein inhibitor for cyclic <b>AMP-dependent</b> protein kinases in <b>interleukin-1(IL-1)-responsive</b> cells blocked <b>IL-1-induced</b> gene transcription that was driven by the kappa immunoglobulin enhancer or the human immunodeficiency virus long terminal repeat.        |
| 10 | Expression of a highly specific protein inhibitor for cyclic <b>AMP-dependent</b> protein kinases in <b>interleukin-1(IL-1)-responsive</b> cells blocked <b>IL-1-induced</b> gene transcription that was driven by the <b>kappa</b> immunoglobulin enhancer or the human immunodeficiency virus long terminal repeat. |
| 3  | Expression of a highly specific protein inhibitor for cyclic <b>AMP-dependent</b> protein kinases in <b>interleukin-1(IL-1)-responsive</b> cells blocked <b>IL-1-induced</b> gene transcription that was driven by the kappa immunoglobulin enhancer or the human immunodeficiency virus long terminal repeat.        |
| 12 | Expression of a highly specific protein inhibitor for cyclic <b>AMP-dependent</b> protein kinases in <b>interleukin-1(IL-1)-responsive</b> cells blocked <b>IL-1-induced</b> gene transcription that was driven by the kappa immunoglobulin enhancer or the human immunodeficiency virus long terminal repeat.        |
